1 Major article: **Rapid emergence of HCMV drug resistance in immunocompromised paediatric patients**  
2 **detected using target enrichment and deep sequencing**

3 Running title: **Deep sequencing drug resistant HCMV**

4 Authors: Charlotte Houldcroft<sup>1</sup> $\alpha$ , Josephine M. Bryant<sup>2</sup>, Daniel P. Depledge<sup>2</sup>, Ben K. Margetts<sup>1</sup>, Jacob  
5 Simmonds<sup>3</sup>, Stephanos Nicolaou<sup>2</sup>, Helena Tutill<sup>2</sup>, Rachel Williams<sup>2</sup>, Austen Worth<sup>3</sup>, Stephen D.  
6 Marks<sup>1,3</sup>, Paul Veys<sup>3</sup>, Elizabeth Whittaker<sup>3</sup>, Judith Breuer<sup>1,2,3</sup>§ and the PATHSEEK consortium

7 **Affiliations:**

- 8 1. Infection, Immunity, Inflammation and Physiological Medicine, Institute of Child Health,  
9 University College London, UK  
10 2. Division of Infection and Immunity, University College London, UK  
11 3. Great Ormond Street Hospital for Children NHS Foundation Trust, London, UK.

12

13 **Abstract – word count 200/200**

14 **Background**

15 Cytomegalovirus can cause fatal disease in immunocompromised patients. With the advent of new anti-  
16 HCMV drugs there is interest in using virus sequence data to monitor resistance and identify new  
17 mutations.

18 **Methods**

19 We used target-enrichment to deep sequence HCMV DNA from 11 immunosuppressed paediatric  
20 patients receiving single or combination anti-HCMV treatment, serially sampled over 1-27 weeks.

21 Changes in consensus sequence and resistance mutations were analysed for three ORFs targeted by  
22 anti-HCMV drugs and the frequencies of drug resistance mutations monitored.

### 23 **Results**

24 Targeted-enriched sequencing of clinical material detected mutations occurring at frequencies of 2%.  
25 Seven patients showed no evidence of drug resistance mutations. Four patients developed drug  
26 resistance mutations a mean of 16 weeks after starting treatment. In two patients, multiple resistance  
27 mutations accumulated at frequencies of 20% or less, including putative resistance mutations P522Q  
28 (UL54) and C480F (UL97). In one patient, resistance was detected 14 days earlier than by PCR.  
29 Phylogenetic analysis suggested recombination or superinfection in one patient.

### 30 **Conclusions**

31 Deep sequencing of HCMV enriched from clinical samples excluded resistance in 7 of eleven subjects  
32 and identified resistance mutations earlier than conventional PCR-based resistance testing in 2 patients.  
33 Detection of multiple low level resistance mutations was associated with poor outcome.

### 34 **Keywords**

- 35 1. Herpesviruses
- 36 2. Antivirals
- 37 3. Next-generation sequencing
- 38 4. Immune deficiency
- 39 5. Immune suppression

40

41 **Word count 3242/3500**

42 **Introduction**

43 Cytomegalovirus (HCMV) is a ubiquitous betaherpesvirus with significant disease-causing potential in  
44 immunocompromised patients, including children with congenital immune deficiencies or immune  
45 suppression following solid organ or bone marrow transplantation. As well as causing pneumonitis,  
46 colitis, retinitis and uveitis[1] all of which contribute to HCMV-related mortality, HCMV disease also  
47 increases the risk of allograft vasculopathy and graft rejection, and significantly increases treatment  
48 costs[2]. Children are at particular risk from HCMV, with over 25% of primary HCMV infections in the UK  
49 occurring in childhood[3]. Up to 16% of patients on prolonged anti-HCMV therapy develop drug  
50 resistance[4, 5], many of them with mutations which cause multi-drug resistance [6]. However, it may  
51 be that not all the mutations that cause resistance are known and this may lead to underestimation of  
52 drug resistance in patients failing therapy.

53 Three drugs are currently licensed for HCMV prophylaxis and treatment, including ganciclovir, foscarnet,  
54 cidofovir; brincidofovir (the oral derivative of cidofovir) and letermovir are in phase III clinical trials;  
55 maribavir is available on a compassionate use basis. Treatment failure occurs in between 20[7]-50[8]%  
56 of HCMV cases, necessitating drug changes and in some cases the use of adoptive immunotherapy.  
57 Genetic evidence of drug resistance can guide clinical decision making[9] but current methods have  
58 technical limitations. Sanger sequencing of PCR amplicons only reliably detects drug resistance  
59 mutations that are present at frequencies of 20% or more[10]. Deep sequencing of PCR amplicons has  
60 enabled detection of minority resistance variants at frequencies as low as 1%[11] which could lead to  
61 earlier detection of HCMV resistance and better treatment. However, PCR and nested PCR are known to  
62 generate mutations which could make the identification of low level resistance mutations more  
63 difficult[12]. To minimize this problem, and to capture the genes currently implicated in antiviral

64 resistance simultaneously, we made use of novel pulldown methodologies[12] and deep sequencing to  
65 analyse the UL27, 54 and 97 genes in serial samples from patients with prolonged HCMV viraemia  
66 despite anti-HCMV therapy. In this study, we include 11 retrospectively identified patients from Great  
67 Ormond Street Hospital for Children who had high CMV loads for two weeks or longer, with clinician  
68 suspicion of anti-viral drug resistance. By sequencing multiple samples from each patient we identified  
69 resistance mutations that were missed by conventional PCR and detected one mutation two weeks  
70 earlier. For the majority of patients, deep sequencing provided reassurance that antiviral resistance had  
71 not developed. Two patients who rapidly developed fixed resistance cleared virus following a change in  
72 treatment. However development of multiple sub-fixation resistance mutations in two patients was  
73 associated with poorer outcome.

74

## 75 **Methods**

### 76 Ethics and sample collection

77 Whole blood samples were stored at Great Ormond Street Hospital for Children (GOSH) at -80C. These  
78 residual samples were collected as part of the standard clinical care at GOSH, and subsequently  
79 approved for research use through the UCL Partners Infection DNA Bank by the NRES Committee  
80 London Fulham (REC reference: 12/LO/1089) All samples were anonymised. Eleven patients with CMV  
81 viral loads that remained unchanged or rose despite 2 weeks of first line anti-CMV therapy were  
82 selected. 20 samples from six patients (B [5], C [2], H [4], I [4], J [4] and M [1]) were tested for UL97  
83 and/or UL54 resistance mutations by PCR and Sanger sequencing at the reference laboratory. Samples  
84 with sufficient material for DNA extraction (200µl) were analysed.

### 85 DNA extraction, library construction, targeted enrichment, and sequencing

86 Total DNA was extracted from 200µl each sample using the EZ1 Virus kit and EZ1 XL extraction system  
87 (Qiagen) or DNA Blood Mini kit (Qiagen) according to manufacturer's instructions. Virus loads were  
88 established by an in-house NHS diagnostic qPCR assay (GOSH). To determine IU/ml, the copies/ml value  
89 is divided by 4.

#### 90 SureSelectXT Target Enrichment: RNA baits design

91 A library of 120-mer RNA baits spanning 115 GenBank HCMV whole and partial genome sequences were  
92 designed using the PATHSEEK consortium's in-house PERL script. Baits specificity was verified by BLASTn  
93 searches against the Human Genomic plus Transcript database. The custom-designed HCMV baits were  
94 uploaded to SureDesign and synthesised by Agilent Technologies.

#### 95 SureSelectXT Target Enrichment: Library preparation, hybridisation and enrichment

96 Total DNA from clinical samples was quantified using the Qubit dsDNA HS assay kit (Life Technologies,  
97 Q32854) and between 200-500ng of DNA was sheared for 150 seconds, using a Covaris E220 focused  
98 ultra-sonication system (PIP 175, duty factor 5, cycles per burst 200). End-repair, non-templated  
99 addition of 3' poly A, adapter ligation, hybridisation, PCR (12 cycles pre-capture and 18 or 22 cycles post  
100 capture) and all post-reaction clean-up steps were performed according to the SureSelectXT Automated  
101 Target Enrichment for Illumina Paired-End Multiplexed Sequencing 200 ng protocol (version F.2) on the  
102 Bravo platform WorkStation B (Agilent Technologies). All recommended quality control steps were  
103 performed on the 2200 TapeStation (Agilent Technologies). Samples were sequenced using the Illumina  
104 MiSeq platform. The presence of a subset of novel SNPs was confirmed by Sanger sequencing of PCR  
105 amplicons (GATC, Germany; Source Biosciences, UK; Manchester Medical Microbiology Partnership, UK;  
106 PHE, UK; and the Royal Free Hospital Virology Department, UK).

#### 107 Sequence assembly and variant analysis

108 Reads were trimmed to remove adapter sequences. Total reads were mapped to the HCMV reference  
109 sequence Merlin (RefSeq ID NC\_006273) ORFs UL27, UL54 and UL97 using CLC Genomics Workbench  
110 8.0.3 (Qiagen). Minority variants were called if: the base was sequenced at least five times; the variant  
111 was present in at least five reads (including two forward and two reverse reads); and it was present at a  
112 frequency of at least 2% (or 1% for bases sequenced over 1000 times). The read direction filter  
113 significance was 0.05 and the relative read direction filter significance was 0.01. Variants were identified  
114 using published lists of HCMV resistance mutations[13-17].

### 115 Phylogenetic analysis

116 Sequences were aligned using ClustalW[18] and manually corrected in MEGA6 if necessary. Phylogenetic  
117 reconstructions were performed using MEGA6 maximum likelihood analysis (Tamura-Nei model, 1000  
118 bootstraps, default settings)[19]. Sequences from the following HCMV genomes were used:  
119 NC\_006273.2 (Merlin), KU317610.1 (AD169), JX512198.1 (Davis), AY223527.1 (Towne), GU937742.1  
120 (Toledo), KJ872542.1 (PAV21), HQ380895.1 (JHC), KJ361971.1 (UKNEQAS1), KJ426589.1 (Han),  
121 KP745728.1 (BE/4/2010), KP745718.1 (CZ/1/2011).

### 122 **Results**

123 The duration of HCMV positivity and treatment for each of the 11 patients is shown in table 1. Using  
124 SureSelect target enrichment we recovered sequence mapping to the UL27, 54, and 97 genes directly  
125 from all the clinical diagnostic samples in a single reaction without the need for virus isolation or PCR of  
126 overlapping genome fragments. A sample read mapping plot for each ORF is shown in supplementary  
127 figure 1. Details of mapping and coverage relative to virus genome copies/ml blood are shown in  
128 supplementary table 1 and supplementary figure 5.

129 From deep sequencing results we were able to stratify patients into two groups: those with no evidence  
130 of developing resistance mutations despite receiving long term antiviral treatment (A, C, D, G, J, K, L);  
131 and those patients who developed known HCMV resistance mutations: either fixed (H and M) or at low  
132 level (B and I). We plotted viral load, drugs received and mutations over time for each of these patients  
133 (figure 1; supplementary figure 2).

#### 134 Comparison of patients with and without drug resistance mutation

135 Comparing the four patients who developed resistance versus the seven who did not, the mean duration  
136 of treatment was longer in those who developed resistance (171 (SD 79) versus 101 (SD 70) days), the  
137 median number of antiviral drugs higher (3.5 versus 2), the peak viraemia higher ( $2.16 \times 10^7$  versus  
138  $5.36 \times 10^6$  virus copies/ml blood) and mean duration of viraemia was greater (257 (SD 89) versus 172 (SD  
139 63). Apart from the last ( $p = 0.048$ ), the numbers were too small for these differences to be significant.  
140 Time to control of viremia in those who survived was faster in the two with resistance (118 (SD 47)  
141 versus 131 days (SD 85)). Mean total lymphocyte counts (TLC) were persistently low in patients B, I and J  
142 who died ie 0.46 (SD 0.56) as compared with patients A, D, G, H, K, L and M who survived and controlled  
143 their viremia to below 1000 copies/ml, mean TLC 1.26 (SD 0.85).

#### 144 Patterns of resistance mutations

145 Patients B, H, I and M developed known drug resistance mutations in UL54 and UL97 during treatment  
146 (figure 1). The mean time to mutations detection was 115 days (range 18-171) following the start of  
147 antiviral treatment. The mutations detected are shown in figure 2. Patient H carried no baseline  
148 resistance mutations by deep-sequencing analysis, but Sanger sequencing detected fixed resistance  
149 mutation L501I (CDV and GCV resistance) in ORF UL54 on day 18 of treatment (day 43 post-admission).  
150 This mutation was not detected by Sanger sequencing on day 56 of treatment despite continued GCV;

151 the patient also received FOS throughout this period. The patient developed a mutation, G598D, in UL97  
152 on day 81 post-admission (treatment day 56) which has previously been seen in patients failing GCV  
153 therapy, detected by Sanger sequencing. However the phenotype of this mutation without concurrent  
154 UL54 mutations has yet to be demonstrated by marker transfer[18, 19]. These samples were not  
155 available for follow-up deep-sequencing.

156 Patient M responded to FOS treatment with a reduction of viral load from ~250k copies/ml to ~50k  
157 copies/ml over 4 days, following the failure of GCV therapy caused by the fixed UL97 mutation H520Q  
158 known to cause an 8-fold (or greater) increase in GCV resistance[17, 20]. This mutation persisted at  
159 fixation for at least 43 days after GCV therapy was withdrawn.

160 In contrast, patients B and I developed multiple low frequency UL54 and UL97 drug resistance mutations  
161 after 112 and 171 days of treatment respectively. Neither patient was able to control their HCMV, and  
162 both eventually died of HCMV-related complications. In patient I, the first resistance mutation at  
163 position A809V in UL54 which is associated with HCMV growth rate attenuation[21] was detected at a  
164 frequency of 26% 171 days after starting GCV. This mutation was lost (or was present at a frequency of  
165 less than 5%) following withdrawal of GCV. The cessation of GCV and start of FOS and CDV was  
166 accompanied by a rise in the GCV UL97 resistance mutation M460I to 96% together with the UL54  
167 resistance mutations Q578L (~3 fold FOS resistance) and K513N (12-fold CDV resistance) which rose to  
168 over 80% within 46 days. This pattern suggests that the M460I GCV resistance mutation was linked on  
169 the same virus to the UL54 resistance mutations which were selected for by FOS and CDV. The rising  
170 frequency of UL54 mutations was accompanied by a rise in HCMV load from  $10^4$  to  $10^7$  gc/ml. Patient I  
171 died with evidence of extensively drug-resistant HCMV, carrying multiple fixed and low frequency  
172 resistance mutations to CDV, GCV and FOS. PCR based resistance testing did not detect resistance until  
173 day 225, when only K513N was detected; on day 238, L802M was also detected as a 'mixture' by PCR.



174 A similar picture emerged in Patient B. Although resistance mutations were not detectable at >2% until  
175 after day 84 following the start of treatment, multiple low frequency (<40%) resistance mutations to  
176 GCV, FOS and CDV, with which the patient had been treated rapidly developed thereafter (figure 1). PCR  
177 and Sanger sequencing failed to detect these low level resistance mutations, with the exception of the  
178 GCV (D588N) substitution which was picked up 14 days after it became detectable by target enrichment.  
179 Despite a persistently high and increasing viral load, none of the low level resistance mutations rose to  
180 fixation (peak frequency <45%). The introduction of MBV, resulted in decline of the majority of low  
181 frequency GCV, FOS and CDV mutations (D301N, D588N and V715M in UL54 and M460I, C592G and  
182 C607Y in UL97). In contrast T409M in UL97 rose in frequency from 2% on day 175 (43 days after  
183 commencing MBV) to 39% at the point of treatment withdrawal. Mutation T409M is known to confer  
184 cross-resistance to MBV and GCV.

185

#### 186 Putative novel drug resistance mutations

187 Potential new resistance mutations were only seen in patient B. Mutations P522Q in UL54 and C480F in  
188 UL97 were detected at days 119 (P522Q) and 175 (C480F), ie 14 days before and 42 days following the  
189 introduction of maribavir, respectively, with the former increasing to 84% by day 193 (60 days following  
190 the start of maribavir treatment) and the latter also increasing over time. P522Q and C480F have not  
191 previously been reported as resistance mutations although variants P522S and P522A are associated  
192 with GCV and CDV resistance[22], and C480R is associated with increased resistance to  
193 methylenecyclopropane nucleoside analogues[23]. C480F appeared at a frequency of 5% at  
194 approximately the same time as the known MBV mutation T409M, rising to 58% by day 193 (60 days of  
195 MBV treatment). P522Q appeared first of the previously undetected mutations and rose rapidly to

196 fixation following initiation of MBV treatment. The appearance of these three mutations was  
197 accompanied by rising viral load, suggesting that all three may confer resistance to MBV.

### 198 **Stop codons, insertions and deletions**

199 Patients I and L (despite never having received MBV) showed evidence of fixed truncating mutations in  
200 UL27 (supplementary figure 4i) both of which would be predicted to confer resistance and/or growth  
201 attenuation [13, 24]. In patient G, a minority stop codon (~10%) was detected at amino acid position 512  
202 in UL54 day 63 post-admission, but was not detected in subsequent samples from this patient  
203 (supplementary figure 4ii).

204 In samples from a number of patients, we detected low-frequency frame shift mutations in ORF UL54, at  
205 frequencies of between 2 and 13%: A (<5%); B (<10%); C (<6%); D (<12%); H (10%); and K (13%)  
206 (supplementary figure 3). Many of these mutations were lost over time, or replaced by different frame  
207 shifts, suggesting they are unfit.

### 208 Phylogenetic analysis of sequences from patients with multi-drug resistance

209 To examine further the complex drug resistance patterns seen in patients B and I, we constructed a  
210 phylogenetic tree for each of the three target regions, including all samples from these patients and  
211 eleven publically available HCMV genomes from GenBank (figure 3i-iii). For patient B, UL27 consensus  
212 sequences clustered in different parts of the tree in a time dependent manner (figure 3i). The consensus  
213 sequences of genes UL54 and UL97 show change over time in patients B and I that is compatible with  
214 sequence evolution due to anti-viral drug pressure. In Patient B the changes in phylogenetic clustering  
215 for UL27 occurred after the start of maribavir on day 133, and may reflect recombination or re-infection  
216 with a second strain of HCMV in this patient.

### 217 **Discussion**

218 Persistent HCMV viraemia is associated with poor outcomes in immunosuppressed patients, including  
219 those undergoing bone marrow[2] and solid organ transplantation, and treatment with anti-HCMV  
220 drugs is indicated. HCMV viraemia carries significant economic costs, estimated at £22,500 (\$32000) per  
221 paediatric bone marrow transplant patient[2]. To explore treatment failure, testing for resistance  
222 mutations and if necessary a change in therapy is recommended if the viral load remains the same or  
223 rises after two[25] or three[8] weeks of treatment. Changes in treatment may also be prompted by side  
224 effects, and bone marrow function particularly in haematological stem cell transplant recipients. In this  
225 study we used deep sequencing to investigate drug resistance patterns in persistently viraemic patients  
226 requiring prolonged treatment. Notwithstanding persistent viraemia, seven patients showed no sign of  
227 drug resistance and six of them were able to control their viremia to below  $10^3$  gc/ml while on  
228 treatment. Patients who developed resistance had higher viremia, lower lymphocyte counts more drugs  
229 and longer duration of antiviral treatment, although numbers were too small for these differences to be  
230 significant. Overall, these data support the findings of others, that development of drug resistance  
231 mutations are associated with poor control of viremia and represent a poor prognostic indicator in  
232 immunosuppressed patients receiving treatment for HCMV; two of four patients developing resistance  
233 mutations died as compared with one of seven who remained resistance-free. Notwithstanding these  
234 findings, the two patients H and M, in whom resistance mutations rose rapidly to fixation, responded to  
235 a change in treatment and controlled their viremia (two qPCR results  $<10^3$  gc/ml) within a mean of 17  
236 weeks. In patient M the H520Q resistance mutation to GCV in ORF UL97 persisted despite withdrawal of  
237 the drug, suggesting that this variant remained fit despite the H520Q mutation.

238 By contrast, where we identified multiple mutations occurring simultaneously, in patients B and I, this  
239 was associated with profound treatment failure and death from HCMV-related disease. Observations  
240 from deep-sequencing of PCR amplicons suggest that multiple resistance mutations occurring at sub-  
241 fixation levels can contribute to a drug-resistant phenotype and this is consistent with the evidence,

242 particularly in patient B in whom high HCMV viral loads persisted in the presence of multiple often low  
243 frequency mutations (figure 1). One explanation is that low frequency drug resistance mutations are  
244 distributed throughout the viral population resulting in many relatively unfit resistant viruses, none of  
245 which can outcompete the others[26]. A similar pattern is seen in patient I, in whom a change from GCV  
246 to CDV appears to have selected for one set of resistance mutations in favour of another, perhaps  
247 because these mutations arose on different populations of the virus within this patient. Further  
248 evidence for this comes from mouse studies making use of cells infected with multiple murine CMV  
249 strains. These strains trans-complement one another, increasing overall viral fitness[27]. Both patients I  
250 and B showed a rapid rise in resistance mutations in response to treatment changes, with concomitant  
251 loss of others. This pattern, particularly in patient B for whom more samples were available, is  
252 consistent with low level persistence of multiply resistant viruses which rapidly replicate under the  
253 selective pressure of a new drug. Conventional PCR and Sanger sequencing failed on at least two  
254 occasions to detect any of these mutations, apart from the D588N which was present at a frequency of  
255 9%. Deep sequencing is therefore able to detect potentially important drug resistance that is missed by  
256 conventional methods. For example the P552Q mutation was detected at frequencies of 1.67% (day  
257 119), 4% (day 126) and 10.64% (day 133), prior to the start of maribavir on day 133. Similarly, PCR and  
258 Sanger sequencing of samples from patient I missed multiple drug resistance mutations at frequencies  
259 of 2-41%, 54 days after these mutations became detectable by target-enriched sequencing.

260 The speed with which the virus became resistant in patient B and the loss of four drugs resistant  
261 mutations in UL97 and UL54, suggested strain replacement rather *de novo* mutation and prompted us to  
262 examine the possibility of mixed infection. This change in phylogenetic clustering for UL27 sequences  
263 following the introduction of marabivir confirmed this suspicion. HCMV is known to be highly  
264 recombigenic[35], and in this case, without whole genome analysis, we are unable to distinguish the  
265 possibility of recombination, re-infection, or reactivation of a pre-existing secondary strain.

266

267 In summary we have demonstrated that deep sequencing of HCMV ORFs UL27, 54 and 97 could be  
268 achieved directly from whole blood with virus loads in the range 80,000 – 65,000,000 copies/ml without  
269 prior culture or PCR. We were able to detect resistance mutations occurring at 2% or more in patients  
270 with viraemia persisting at levels of  $\geq 10^4$  gc/ml for two weeks or more. Our data suggest that in contrast  
271 to amplicon and Sanger sequencing, deep sequencing can exclude resistance in patients with  
272 persistently high levels of viraemia, thereby providing a measure of support prolonging current antiviral  
273 treatment or returning to them at a later date if further treatment is needed. Where resistance  
274 mutations are detected, we observed two patterns, rapid development of fixed resistance with  
275 clearance of virus following a change in treatment, and development of multiple sub-fixation resistance  
276 mutations, with potentially poorer outcome. Further investigation is needed to determine whether  
277 these patterns are indeed predictive of outcome. We do not yet understand why multiple minority drug  
278 resistance mutations arise in some patients. Multiple minority variants, which are likely to be better  
279 detected using deep sequencing methods, appeared to complicate treatment to a greater extent than  
280 single fixed resistance mutations. In our patients multiple low level drug mutations was associated with  
281 poor prognosis probably because they increased the risk that a change in drug would select for a pre-  
282 existing mutation. Deep-sequencing of HCMV allows us to characterise these mutations and could be  
283 used to inform which drugs are given earlier in treatment, or to highlight those patients for whom  
284 additional non-pharmacological interventions such as withdrawal of immunosuppression, or the use of  
285 virus-specific cytotoxic T lymphocytes are most appropriate.

286 Data availability

287 Raw sequencing data has been deposited in the European Nucleotide Archive under project accession  
288 PRJEB12814. Bait sequences are available by request from the authors.

289 Author contributions

290 Judith Breuer (JB), CJH and DPD conceived the study design. CJH, EW, JS, AW, SM and PV supplied  
291 patient clinical data. CJH, DPD, and SN performed the DNA extractions. DPD, HT, CJH and SN sequenced  
292 the samples. RW administered the study. CJH, JMB and DPD analysed the data. CJH, JMB and JB wrote  
293 the paper. All authors read and approved the manuscript.

294 Funding

295 This work was supported by funding from the European Union's Seventh Programme for research,  
296 technological development and demonstration under grant agreement no. 304875. J Breuer is  
297 supported by the UCL/UCLH and CJ Houldcroft by the UCL/GOSH Biomedical Resource centres. DP  
298 Depledge is supported by an MRF New Investigator Award. SN was funded by a Microbiology Society  
299 Harry Smith vacation scholarship. JB receives funding from the UCL/UCLH NIHR biomedical research  
300 centre.

301 Acknowledgements

302 We acknowledge all partners within the PATHSEEK consortium (University College London, Erasmus MC,  
303 QIAGEN AAR, and Oxford Gene Technology). We acknowledge infrastructure support from the UCL MRC  
304 Centre for Molecular Medical Virology. The clinical HCMV samples were provided by the UCL Infection  
305 DNA Bank, supported by University College London, Great Ormond Street Hospital, Royal Free Hospital  
306 and Barts and The London NHS Trust. This project was supported by the National Institute for Health  
307 Research Biomedical Research Centre at Great Ormond Street Hospital for Children NHS Foundation

308 Trust and University College London. The authors would also like to thank Dr James Taylor (University of  
309 Cambridge), Dr Kimberly Gilmour (Great Ormond Street Hospital) and Dr Karen Buckland (UCL Institute  
310 of Child Health).

### 311 Conflicts of interest

312 The authors declare no relevant conflicts of interest

### 313 Previous presentations

314 Data associated with this paper were previously presented at the Society for General Microbiology  
315 conference in Birmingham, UK (2015).

316

### 317 §Corresponding author

318 Professor Judith Breuer, Division of Infection & Immunity, Cruciform Building, London, WC1E 6BT, UK

319 [j.breuer@ucl.ac.uk](mailto:j.breuer@ucl.ac.uk) Tel: 020 3108 2130

### 320 α Alternative corresponding author

321 Dr Charlotte Houldcroft, Infection, Immunity, Inflammation and Physiological Medicine, UCL Institute of  
322 Child Health, Guilford Street, London, WC1N 1EH, UK

323 [c.houldcroft@ucl.ac.uk](mailto:c.houldcroft@ucl.ac.uk) Tel: 02079052234

324

### 325 **Abbreviations**

326 ART                      Artusenate

|     |          |                                               |
|-----|----------|-----------------------------------------------|
| 327 | BCDV     | Brincidofovir                                 |
| 328 | CAEBV    | Chronic active EBV                            |
| 329 | CDV      | Cidofovir                                     |
| 330 | HCMV     | Human cytomegalovirus                         |
| 331 | CMV-IVIG | Cytomegalovirus intravenous immune globulin   |
| 332 | CTL      | Cytotoxic T cells                             |
| 333 | FOS      | Foscarnet                                     |
| 334 | GCV      | Ganciclovir                                   |
| 335 | GOSH     | Great Ormond Street Hospital for Children, UK |
| 336 | LEF      | Leflunomide                                   |
| 337 | LTV      | Letermovir                                    |
| 338 | MBV      | Maribavir                                     |
| 339 | VGCV     | Valganciclovir                                |
| 340 | WB       | Whole blood                                   |

341

342 **References**

- 343 1. Rafailidis PI, Mourtzoukou EG, Varbobitis IC, Falagas ME. Severe cytomegalovirus infection in  
344 apparently immunocompetent patients: a systematic review. *Virology journal* **2008**; 5:47.



- 345 2. Hiwarkar P, Gaspar HB, Gilmour K, et al. Impact of viral reactivations in the era of pre-emptive  
346 antiviral drug therapy following allogeneic haematopoietic SCT in paediatric recipients. *Bone Marrow*  
347 *Transplant* **2013**; 48:803-8.
- 348 3. Patrick EJ, Higgins CD, Crawford DH, McAulay KA. A cohort study in university students: investigation  
349 of risk factors for cytomegalovirus infection. *Epidemiol Infect* **2014**; 142:1990-5.
- 350 4. Shmueli E, Or R, Shapira MY, et al. High rate of cytomegalovirus drug resistance among patients  
351 receiving preemptive antiviral treatment after haploidentical stem cell transplantation. *The Journal of*  
352 *infectious diseases* **2014**; 209:557-61.
- 353 5. Couzi L, Helou S, Bachelet T, et al. High incidence of anticytomegalovirus drug resistance among D+R-  
354 kidney transplant recipients receiving preemptive therapy. *American journal of transplantation : official*  
355 *journal of the American Society of Transplantation and the American Society of Transplant Surgeons*  
356 **2012**; 12:202-9.
- 357 6. Hantz S, Garnier-Geoffroy F, Mazon MC, et al. Drug-resistant cytomegalovirus in transplant  
358 recipients: a French cohort study. *The Journal of antimicrobial chemotherapy* **2010**; 65:2628-40.
- 359 7. Asberg A, Humar A, Rollag H, et al. Oral valganciclovir is noninferior to intravenous ganciclovir for the  
360 treatment of cytomegalovirus disease in solid organ transplant recipients. *American journal of*  
361 *transplantation : official journal of the American Society of Transplantation and the American Society of*  
362 *Transplant Surgeons* **2007**; 7:2106-13.
- 363 8. van der Beek MT, Marijt EW, Vossen AC, et al. Failure of pre-emptive treatment of cytomegalovirus  
364 infections and antiviral resistance in stem cell transplant recipients. *Antiviral therapy* **2012**; 17:45-51.
- 365 9. Houldcroft C. Sequencing drug-resistant cytomegalovirus in pediatric patients: toward personalized  
366 medicine. *Future Virology* **2015**:1-4.
- 367 10. Sahoo MK, Lefterova MI, Yamamoto F, et al. Detection of cytomegalovirus drug resistance mutations  
368 by next-generation sequencing. *Journal of clinical microbiology* **2013**; 51:3700-10.
- 369 11. Gorzer I, Guelly C, Trajanoski S, Puchhammer-Stockl E. Deep sequencing reveals highly complex  
370 dynamics of human cytomegalovirus genotypes in transplant patients over time. *J Virol* **2010**; 84:7195-  
371 203.
- 372 12. Depledge DP, Palser AL, Watson SJ, et al. Specific capture and whole-genome sequencing of viruses  
373 from clinical samples. *PLoS One* **2011**; 6:e27805.
- 374 13. Hakki M, Drummond C, Houser B, Marousek G, Chou SW. Resistance to maribavir is associated with  
375 the exclusion of pUL27 from nucleoli during human cytomegalovirus infection. *Antivir Res* **2011**; 92:313-  
376 8.
- 377 14. Chou S. Phenotypic diversity of cytomegalovirus DNA polymerase gene variants observed after  
378 antiviral therapy. *J Clin Virol* **2011**; 50:287-91.
- 379 15. Chou S. Rapid In Vitro Evolution of Human Cytomegalovirus UL56 Mutations That Confer Letermovir  
380 Resistance. *Antimicrob Agents Chemother* **2015**; 59:6588-93.
- 381 16. Chou S. Approach to drug-resistant cytomegalovirus in transplant recipients. *Curr Opin Infect Dis*  
382 **2015**; 28:293-9.
- 383 17. Gohring K, Hamprecht K, Jahn G. Antiviral Drug- and Multidrug Resistance in Cytomegalovirus  
384 Infected SCT Patients. *Comput Struct Biotechnol J* **2015**; 13:153-9.
- 385 18. Thompson JD, Gibson TJ, Higgins DG. Multiple sequence alignment using ClustalW and ClustalX. *Curr*  
386 *Protoc Bioinformatics* **2002**; Chapter 2:Unit 2 3.
- 387 19. Tamura K, Stecher G, Peterson D, FilipSKI A, Kumar S. MEGA6: Molecular Evolutionary Genetics  
388 Analysis version 6.0. *Molecular biology and evolution* **2013**; 30:2725-9.
- 389 20. Chou S, Waldemer RH, Senters AE, et al. Cytomegalovirus UL97 phosphotransferase mutations that  
390 affect susceptibility to ganciclovir. *The Journal of infectious diseases* **2002**; 185:162-9.

- 391 21. Chou S, Marousek GI, Van Wechel LC, Li S, Weinberg A. Growth and drug resistance phenotypes  
392 resulting from cytomegalovirus DNA polymerase region III mutations observed in clinical specimens.  
393 *Antimicrob Agents Chemother* **2007**; 51:4160-2.
- 394 22. Chou S. Cytomegalovirus UL97 mutations in the era of ganciclovir and maribavir. *Reviews in medical*  
395 *virology* **2008**; 18:233-46.
- 396 23. Komazin-Meredith G, Chou S, Prichard MN, et al. Human cytomegalovirus UL97 kinase is involved in  
397 the mechanism of action of methylenecyclopropane analogs with 6-ether and -thioether substitutions.  
398 *Antimicrob Agents Chemother* **2014**; 58:274-8.
- 399 24. Chou S. Diverse cytomegalovirus UL27 mutations adapt to loss of viral UL97 kinase activity under  
400 maribavir. *Antimicrob Agents Chemother* **2009**; 53:81-5.
- 401 25. Boeckh M, Ljungman P. How we treat cytomegalovirus in hematopoietic cell transplant recipients.  
402 *Blood* **2009**; 113:5711-9.
- 403 26. Chou S, Ercolani RJ, Sahoo MK, Lefterova MI, Strasfeld LM, Pinsky BA. Improved detection of  
404 emerging drug-resistant mutant cytomegalovirus subpopulations by deep sequencing. *Antimicrob*  
405 *Agents Chemother* **2014**; 58:4697-702.
- 406 27. Cicin-Sain L, Podlech R, Messerle M, Reddehase MJ, Koszinowski UH. Frequent coinfection of cells  
407 explains functional in vivo complementation between cytomegalovirus variants in the multiply infected  
408 host. *Journal of Virology* **2005**; 79:9492-502.
- 409 28. Drouot E, Piret J, Boivin G. Novel method based on "en passant" mutagenesis coupled with a *gaussia*  
410 luciferase reporter assay for studying the combined effects of human cytomegalovirus mutations.  
411 *Journal of clinical microbiology* **2013**; 51:3216-24.
- 412 29. Manuel O, Asberg A, Pang X, et al. Impact of genetic polymorphisms in cytomegalovirus glycoprotein  
413 B on outcomes in solid-organ transplant recipients with cytomegalovirus disease. *Clinical infectious*  
414 *diseases : an official publication of the Infectious Diseases Society of America* **2009**; 49:1160-6.
- 415 30. Coaquette A, Bourgeois A, Dirand C, Varin A, Chen W, Herbein G. Mixed cytomegalovirus  
416 glycoprotein B genotypes in immunocompromised patients. *Clinical infectious diseases : an official*  
417 *publication of the Infectious Diseases Society of America* **2004**; 39:155-61.
- 418 31. Sowmya P, Madhavan HN. Analysis of mixed infections by multiple genotypes of human  
419 cytomegalovirus in immunocompromised patients. *J Med Virol* **2009**; 81:861-9.
- 420 32. Stanton R, Westmoreland D, Fox JD, Davison AJ, Wilkinson GW. Stability of human cytomegalovirus  
421 genotypes in persistently infected renal transplant recipients. *J Med Virol* **2005**; 75:42-6.
- 422 33. Puchhammer-Stockl E, Gorzer I, Zoufaly A, et al. Emergence of multiple cytomegalovirus strains in  
423 blood and lung of lung transplant recipients. *Transplantation* **2006**; 81:187-94.
- 424 34. Puchhammer-Stockl E, Gorzer I. Human cytomegalovirus: an enormous variety of strains and their  
425 possible clinical significance in the human host. *Future Virology* **2011**; 6:259-71.
- 426 35. Sijmons S, Thys K, Mbong Ngwese M, et al. High-throughput analysis of human cytomegalovirus  
427 genome diversity highlights the widespread occurrence of gene-disrupting mutations and pervasive  
428 recombination. *Journal of virology* **2015**.

429

430

431 Table 1: Patient characteristics

| Patient | Age | Sex | No of samples | Underlying diagnosis                       | Peak HCMV (genome copies/ml WB) | Duration of viraemia (days at >10 <sup>4</sup> gc/ml) | Time (days) to reduction in viraemia (<10 <sup>3</sup> c/ml) following treatment initiation | Immune suppression and stimulation                                       | Antivirals                                 | Clinical outcomes                          | HCMV drug resistant mutations detected | Treated for HCMV before first sample? |
|---------|-----|-----|---------------|--------------------------------------------|---------------------------------|-------------------------------------------------------|---------------------------------------------------------------------------------------------|--------------------------------------------------------------------------|--------------------------------------------|--------------------------------------------|----------------------------------------|---------------------------------------|
| A       | 3 y | M   | 2             | B-acute lymphoblastic leukaemia            | 2134470                         | 28                                                    | 86                                                                                          | Ciclosporin, rituximab                                                   | FOS, GCV                                   | Relapsed ALL after BMT; on-going treatment | None                                   | Yes                                   |
| B       | 2 y | F   | 12            | Dyskeratosis congenita                     | 65611500                        | 200                                                   | 200                                                                                         | NA                                                                       | FOS, GCV, CDV, MBV, LEF, ART, CMV-IVIG     | CMV colitis & CMV pneumonitis; death       | Yes                                    | Yes                                   |
| C       | 1 y | M   | 23            | Under-developed thymus (no mature T cells) | 18377000                        | 110                                                   | 259                                                                                         | Ciclosporin, methylprednisolone sodium succinate, mycophenolate mofetil, | FOS, GCV, ACV, palivizumab, immunoglobulin | Bone marrow transplant                     | None                                   | Yes                                   |

|   |         |   |   |                                                      |         |    |     |                                                                                                                                                                                                 |                                      |                        |      |     |
|---|---------|---|---|------------------------------------------------------|---------|----|-----|-------------------------------------------------------------------------------------------------------------------------------------------------------------------------------------------------|--------------------------------------|------------------------|------|-----|
|   |         |   |   |                                                      |         |    |     | prednisolone<br>(privigen),<br>ribavirin                                                                                                                                                        |                                      |                        |      |     |
| D | 11<br>y | M | 3 | Renal<br>transplant                                  | 1490480 | 13 | 195 | Tacrolimus,<br>prednisolone,<br>mycophenolat<br>e mofetil                                                                                                                                       | V-GCV                                | Recovered              | None | Yes |
| G | 9 y     | M | 3 | Kostmann<br>syndrome<br>(congenital<br>neutropaenia) | 330209  | 38 | 179 | Ciclosporin,<br>hydrocortisone<br>,<br>immunoglobuli<br>n (Privigen),<br>lenograstim,<br>methylprednis<br>olone sodium<br>succinate,<br>prednisolone,<br>rituximab,<br>tacrolimus<br>(topical). | FOS, GCV,<br>CDV, ACV                | Bone marrow transplant | None | Yes |
| H | 7 m     | M | 5 | ADA SCID                                             | 3965090 | 45 | 189 | Ciclosporin,<br>lenograstim                                                                                                                                                                     | ACV, FOS,<br>GCV, CDV,<br>palivizuma | Gene therapy           | Yes  | No  |

|   |         |   |   |                         |          |     |     |                                                                                                 |                            |                          |      |     |
|---|---------|---|---|-------------------------|----------|-----|-----|-------------------------------------------------------------------------------------------------|----------------------------|--------------------------|------|-----|
|   |         |   |   |                         |          |     |     |                                                                                                 | b                          |                          |      |     |
| I | 11<br>m | M | 3 | DiGeorge syndrome       | 16721700 | 157 | 255 | Ciclosporin, hydrocortisone sodium succinate, methylprednisolone sodium succinate, prednisolone | FOS, GCV, CDV, palivizumab | Thymus transplant; death | Yes  | Yes |
| J | 11<br>m | M | 3 | Acute myeloid leukaemia | 11728700 | 57  | 94  | Ciclosporin, hydrocortisone sodium succinate, lenograstim, methylprednisolone sodium succinate  | ACV, FOS                   | Death                    | None | Yes |
| K | 12<br>y | M | 2 | Heart transplant        | 393192   | 12  | 218 | Mycophenolate mofetil, prednisolone, tacrolimus                                                 | GCV, V-GCV                 | On-going treatment       | None | Yes |

|   |         |   |   |                       |         |    |     |                                                                                                                                                                                   |                                                |                        |     |     |
|---|---------|---|---|-----------------------|---------|----|-----|-----------------------------------------------------------------------------------------------------------------------------------------------------------------------------------|------------------------------------------------|------------------------|-----|-----|
| L | 16<br>y | M | 5 | Heart<br>transplant   | 3091860 | 28 | 173 | Mycophenolat<br>e mofetil,<br>prednisolone,<br>tacrolimus                                                                                                                         | ACV, GCV,<br>V-GCV                             | On-going treatment     | No  | No  |
| M | 17<br>y | F | 1 | Chronic active<br>EBV | 256986  | 39 | 382 | Ciclosporin,<br>dexamethason<br>e,<br>hydrocortisone<br>, lenograstim,<br>methylprednis<br>olone sodium<br>succinate,<br>mycophenolat<br>e mofetil,<br>prednisolone,<br>rituximab | ACV, GCV,<br>FOS,<br>oseltamivir,<br>zanamivir | Bone marrow transplant | Yes | Yes |

432

433 Table 2: Mutations

|                | <b>UL54</b>                               |                                             | <b>UL97</b>                         |                        |
|----------------|-------------------------------------------|---------------------------------------------|-------------------------------------|------------------------|
| <b>Patient</b> | <b>Known resistance</b>                   | <b>Novel mutations</b>                      | <b>Known resistance</b>             | <b>Novel mutations</b> |
| <b>A</b>       | None                                      | D759N                                       | None                                | None                   |
| <b>B</b>       | D301N<br>D588N<br>V715M                   | P383S; P522Q*;<br>C592S;<br>R593S;<br>T700P | T409M;<br>M460I;<br>C592G;<br>C607Y | C480F                  |
| <b>C</b>       | None                                      | 782 frame shift<br>853 frame shift          | None                                | None                   |
| <b>D</b>       |                                           | C988F                                       |                                     |                        |
| <b>G</b>       | None                                      | C211F<br>E235K<br>E944D<br>S897L<br>D898N   | None                                | S512STOP               |
| <b>H</b>       | L501*                                     | None                                        | None                                | G598D*                 |
| <b>I</b>       | K513N<br>Q578L<br>E576D<br>L802M<br>A809V | M393L<br>A987V                              | M460I                               | None                   |

|          |      |      |        |       |
|----------|------|------|--------|-------|
| <b>J</b> | None | None | None   | None  |
| <b>K</b> | None | None | None   | I429F |
| <b>L</b> | None |      | None   |       |
| <b>M</b> | None |      | H520Q* |       |

434 \*Confirmed by Sanger sequencing

435
